# Supplementary material for: Rates of visual field change and functional progression in glaucoma following trabecular microbypass implantation of iStent technologies: a meta-analysis
Source: HighWire-hosted journal article supplement (doi:10.1136/bmjophth-2023-001575), 2024-02-01
Supplement: bmjophth-2023-001575supp001_data_supplement.pdf [file bmjophth-2023-001575supp001_data_supplement.pdf]

**Supplementary material 1: Articles with visual field data excluded in the last phase of screening.**

AHMED, Iqbal Ike K., KATZ, L. Jay, CHANG, David F., *et al.* Prospective evaluation of microinvasive glaucoma surgery with trabecular microbypass stents and prostaglandin in open-angle glaucoma. *Journal of Cataract & Refractive Surgery*, 2014, vol. 40, no 8, p. 1295-1300.

DONNENFELD, Eric D., SOLOMON, Kerry D., VOSKANYAN, Lilit, *et al.* A prospective 3-year follow-up trial of implantation of two trabecular microbypass stents in open-angle glaucoma. *Clinical Ophthalmology*, 2015, p. 2057-2065.

ANSARI, Ejaz. 5-year outcomes of single iStent (G1) trabecular microbypass implantation with phacoemulsification in moderately advanced primary open angle glaucoma. *Plos one*, 2021, vol. 16, no 9, p. e0257015.

BERDAHL, John, VOSKANYAN, Lilit, MYERS, Jonathan S., *et al.* Implantation of two second-generation trabecular micro-bypass stents and topical travoprost in open-angle glaucoma not controlled on two preoperative medications: 18-month follow-up. *Clinical & Experimental Ophthalmology*, 2017, vol. 45, no 8, p. 797-802.

CLEMENT, Colin I., HOWES, Frank, IOANNIDIS, Alexandros S., *et al.* One-year outcomes following implantation of second-generation trabecular micro-bypass stents in conjunction with cataract surgery for various types of glaucoma or ocular hypertension: multicenter, multi-surgeon study. *Clinical Ophthalmology (Auckland, NZ)*, 2019, vol. 13, p. 491.

CLEMENT, Colin, HOWES, Frank, IOANNIDIS, Alexandros S., *et al.* Two-year multicenter outcomes of iStent inject trabecular micro-bypass stents combined with phacoemulsification in various types of glaucoma and ocular hypertension. *Clinical Ophthalmology*, 2020, p. 3507-3517.

GALLARDO, Mark J., SUPNET, Richard A., GIAMPORCARO, Jane Ellen, *et al.* Outcomes of combined trabecular micro-bypass and phacoemulsification in a predominantly Hispanic patient population. *Clinical Ophthalmology*, 2016, p. 1931-1937.

KATZ, L. Jay, ERB, Carl, CARCELLER, Guillamet Amadeu, *et al.* Prospective, randomized study of one, two, or three trabecular bypass stents in open-angle glaucoma subjects on topical hypotensive medication. *Clinical Ophthalmology*, 2015, p. 2313-2320.

SALIMI, Ali, WATT, Harrison, et HARASYMOWYCZ, Paul. Three-year outcomes of second-generation trabecular micro-bypass stents (iStent inject) with phacoemulsification in various glaucoma subtypes and severities. *Journal of Glaucoma*, 2021, vol. 30, no 3, p. 266-275.

VOLD, Steven D., VOSKANYAN, Lilit, TETZ, Manfred, *et al.* Newly diagnosed primary open-angle glaucoma randomized to 2 trabecular bypass stents or prostaglandin: outcomes through 36 months. *Ophthalmology and Therapy*, 2016, vol. 5, p. 161-172.
